# Supplementary material
Source: PubMed Central journal article supplement (PMC8328892)
Supplement: 405_2020_6519_MOESM1_ESM.pdf [file 405_2020_6519_MOESM1_ESM.pdf]

*European Archives of Oto-Rhino-Laryngology*

Sarah Riemann<sup>1</sup>, Iva Speck<sup>1</sup>, Kathrin Gerstaecker<sup>1</sup>, Christoph Becker<sup>1</sup>, Andreas Knopf<sup>1</sup>

**Collateral damage of the COVID-19 pandemic – an alarming decline in critical procedures in otorhinolaryngology in a German university hospital**

<sup>1</sup> Department of Otorhinolaryngology - Head and Neck Surgery, University Hospital of Freiburg, Germany

Corresponding author:

Sarah Riemann

Department of Otorhinolaryngology- Head and Neck Surgery

University Hospital of Freiburg

Killianstraße 5, 79106 Freiburg, Germany

sarah.riemann@uniklinik-freiburg.de



**Table 2.** OPS-Codes used to define 'critical' procedures, with subcategories 'suspected malignancy', 'emergency', 'salivary gland surgery' and 'tumor surgery'.

| <b>Category</b> | <b>Subcategory</b>     | <b>OPS-code</b>                                                                                                                                                                                                                                                         |
|-----------------|------------------------|-------------------------------------------------------------------------------------------------------------------------------------------------------------------------------------------------------------------------------------------------------------------------|
| Critical        | Suspected malignancy   | 5-401.00, 1-610.0, 1-611.0, 1-630.1                                                                                                                                                                                                                                     |
| Critical        | Emergency              | 5-210.1, 5-210.4, 5-289.1, 5-289.2, 5-211.20,<br>5-270.5, 5-270.6, 5-281.1, 5-280.0, 5-280.1,<br>5-280.2, 5-280.3, 5-280.x, 5-203.0*                                                                                                                                    |
| Critical        | Salivary gland surgery | 5-262.00, 5-262.01, 5-262.02, 5-262.03,<br>5-262.04, 5-262.05, 5-262.0x, 5-262.11,<br>5-262.12, 5-262.13, 5-262.14, 5-262.15,<br>5-262.1x, 5-262.20, 5-262.21, 5-262.22,<br>5-262.23, 5-262.24, 5-262.25, 5-262.2x,<br>5-262.3, 5-262.40, 5-262.41, 5-261.3,<br>5-261.4 |

---

\* Mastoidectomy was only considered 'critical' in combination with the ICD-10 code for acute mastoiditis, (H70.0).

| <b>Category</b> | <b>Subcategory</b> | <b>OPS-code</b>                                                                                                                                                                                                                                                                                                                                                                                                                                                                                                                                                                                                                                                                                                                                                                                                                                                                                                                                                                                                                                                     |
|-----------------|--------------------|---------------------------------------------------------------------------------------------------------------------------------------------------------------------------------------------------------------------------------------------------------------------------------------------------------------------------------------------------------------------------------------------------------------------------------------------------------------------------------------------------------------------------------------------------------------------------------------------------------------------------------------------------------------------------------------------------------------------------------------------------------------------------------------------------------------------------------------------------------------------------------------------------------------------------------------------------------------------------------------------------------------------------------------------------------------------|
| Critical        | Tumor surgery      | 5-251.00, 5-251.01, 5-251.02, 5-251.03,<br>5-251.0x, 5-251.10, 5-251.11, 5-251.12,<br>5-251.13, 5-251.1x, 5-251.20, 5-251.21,<br>5-251.22, 5-251.23, 5-251.2x, 5-251.x0,<br>5-251.x1, 5-251.x2, 5-251.x3, 5-251.xx,<br>5-252.00, 5-252.01, 5-252.02, 5-252.03,<br>5-252.0x, 5-252.10, 5-252.11, 5-252.12,<br>5-252.13, 5-252.1x, 5-252.20, 5-252.21,<br>5-252.22, 5-252.23, 5-252.2x, 5-252.30,<br>5-252.31, 5-252.32, 5-252.33, 5-252.3x,<br>5-252.40, 5-252.41, 5-252.42, 5-252.43,<br>5-252.4x, 5-252.x0, 5-252.x1, 5-252.x2,<br>5-252.x3, 5-252.xx, 5-277.00, 5-277.01,<br>5-277.02, 5-277.03, 5-277.0x, 5-277.10,<br>5-277.11, 5-277.12, 5-277.13, 5-277.1x,<br>5-277.20, 5-277.21, 5-277.22, 5-277.23,<br>5-277.2x, 5-277.30, 5-277.31, 5-277.32,<br>5-277.33, 5-277.3x, 5-277.x0, 5-277.x1,<br>5-277.x2, 5-277.x3, 5-277.xx, 5-281.2,<br>5-295.00, 5-295.01, 5-295.02, 5-295.03,<br>5-295.04, 5-295.05, 5-295.0x, 5-295.10,<br>5-295.11, 5-295.12, 5-295.13, 5-295.14,<br>5-295.15, 5-295.1x, 5-295.30, 5-295.31,<br>5-295.32, 5-295.33, 5-295.34, 5-295.35, |

---

5-295.3x, 5-295.x0, 5-295.x1, 5-295.x2,  
5-295.x3, 5-295.x4, 5-295.x5, 5-295.xx,  
5-296.00, 5-296.01, 5-296.02, 5-296.03,  
5-296.04, 5-296.05, 5-296.06, 5-296.07,  
5-296.0x, 5-296.10, 5-296.11, 5-296.12,  
5-296.13, 5-296.14, 5-296.15, 5-296.16,  
5-296.17, 5-296.1x, 5-296.30, 5-296.31,  
5-296.32, 5-296.33, 5-296.34, 5-296.35,  
5-296.36, 5-296.37, 5-296.3x, 5-296.x0,  
5-296.x1, 5-296.x2, 5-296.x3, 5-296.x4,  
5-296.x5, 5-296.x6, 5-296.x7, 5-296.xx,  
5-301.0, 5-301.1, 5-301.2, 5-301.3, 5-301.x,  
5-302.0, 5-302.1, 5-302.2, 5-302.3, 5-302.4,  
5-302.5, 5-302.6, 5-302.7, 5-302.8, 5-302.9,  
5-302.x, 5-303.00, 5-303.01, 5-303.02,  
5-303.03, 5-303.04, 5-303.05, 5-303.06,  
5-303.07, 5-303.0x, 5-303.10, 5-303.11,  
5-313.12, 5-313.13, 5-313.14, 5-313.15,  
5-313.16, 5-313.17, 5-313.1x, 5-303.20,  
5-303.21, 5-323.22, 5-323.23, 5-323.24,  
5-323.25, 5-323.26, 5-323.27, 5-323.2x,  
5-303.x0, 5-303.x1, 5-303.x2, 5-303.x3,  
5-303.x4, 5-303.x5, 5-303.x6, 5-303.x7,  
5-303.x

---

---

**Table 3.** P-values of Wilcoxon-Mann-Whitney tests.

---

|                                    |    |                                   | <b>p-value</b> |
|------------------------------------|----|-----------------------------------|----------------|
| Critical_2018_before               | vs | Critical_2018_after               | 0.71           |
| Critical_2019_before               | vs | Critical_2019_after               | 0.56           |
| Critical_2020_before               | vs | Critical_2020_after               | 0.001          |
| Critical_2018_after                | vs | Critical_2020_after               | 0.003          |
| Critical_2019_after                | vs | Critical_2020_after               | 0.002          |
| Suspected malignancy_2020_before   | vs | Suspected malignancy_2020_after   | 0.002          |
| Tumor operation_2020_before        | vs | Tumor operation_2020_after        | 0.43           |
| Emergency procedures_2020_before   | vs | Emergency procedures_2020_after   | 0.05           |
| Salivary gland surgery_2020_before | vs | Salivary gland surgery_2020_after | 0.05           |

---

---

**Table 4.** Weekly number of respective procedures eight weeks before and after March 16.

All data are reported as median and first and third quartiles.

---

|                        | <b>Before March 16</b> | <b>After March 16</b> |
|------------------------|------------------------|-----------------------|
| <hr/> <b>Year 2020</b> |                        |                       |
| Critical               | 44 (37, 48.25)         | 24 (20.25, 26.75)     |
| Suspected malignancy   | 21.5 (20.25, 24)       | 11.5 (10.75, 15.25)   |
| Tumor operation        | 2 (2, 2.25)            | 2 (0.75, 2.25)        |
| Emergency procedures   | 4.5 (3, 6.75)          | 3 (1.75, 3.25)        |
| Salivary gland surgery | 3 (2.75, 4.25)         | 3 (1.75, 3.25)        |
| <b>Year 2019</b>       |                        |                       |
| Critical               | 42 (37.75, 45.25)      | 45 (39, 48)           |
| <b>Year 2018</b>       |                        |                       |
| Critical               | 38 (36.75, 46)         | 41 (33.75, 45.5)      |

---
